# Supplementary material
Source: MDPI journal article supplement (https://www.mdpi.com/2071-1050/14/15/9173)
Supplement: s1 [file s1 › sustainability-1787383-supplementary.pdf]

# A System Thinking Approach towards Single-Use Plastics Reduction in Food Delivery Business in Thailand

Boonchanit Wongprapinkul <sup>1</sup> and Sujitra Vassanadumrongdee <sup>2,\*</sup>

**Table S1:** Stakeholders and interview questions.

| Stakeholders                   | Interview Questions                                                                                                                                                                                                                                                                                                                                                                                                                                                                                                                                                                                                                                                                                                                                                                                                                                                                                                                                          |
|--------------------------------|--------------------------------------------------------------------------------------------------------------------------------------------------------------------------------------------------------------------------------------------------------------------------------------------------------------------------------------------------------------------------------------------------------------------------------------------------------------------------------------------------------------------------------------------------------------------------------------------------------------------------------------------------------------------------------------------------------------------------------------------------------------------------------------------------------------------------------------------------------------------------------------------------------------------------------------------------------------|
| 1. Food Delivery Platforms     | <ul style="list-style-type: none"> <li>- What are the company's measures to support the reduction of SUPs packaging in the delivery business (if any)?</li> <li>- What has been/ will be done to improve the 'opt-in' measure at both consumer and merchant ends?</li> <li>- Comments, suggestions, and expectation towards the Memorandum of Understanding (MOU) signed among 15 agencies in August 2020 to reduce SUPs waste from food delivery.</li> <li>- Is there any promotion/ incentive for the merchant partners who want to take part in SUPs packaging reduction effort?</li> <li>- What has been/ will be communicated to the public, merchant partners, drivers, and other relevant parties regarding SUP packaging issues?</li> <li>- Where in the system should be improved the most with the goal to reduce SUP packaging?</li> <li>- What kind of support from the government is needed to achieve SUPs reduction in the system?</li> </ul> |
| 2. Food Retailers              | <ul style="list-style-type: none"> <li>- What types of packaging are used? What are packaging components in one order?</li> <li>- Is there any measure at your retail to support the reduction of SUPs packaging in the delivery orders?</li> <li>- What are the challenges in reducing SUP in the food delivery sector?</li> <li>- What are the guidelines towards 'no cutlery' orders?</li> <li>- Where in the system should be improved the most with the goal to reduce SUP packaging?</li> </ul>                                                                                                                                                                                                                                                                                                                                                                                                                                                        |
| 3. Civil Society Organizations | <ul style="list-style-type: none"> <li>- What are the challenges in operating sustainable niches?</li> <li>- What kinds of messages about plastic waste do you communicate to which group of audience?</li> <li>- What are your expectations towards each actor in the system?</li> <li>- Where in the system should be improved the most with the goal to reduce SUP packaging?</li> </ul>                                                                                                                                                                                                                                                                                                                                                                                                                                                                                                                                                                  |
| 4. Policy-Level Agencies       | <ul style="list-style-type: none"> <li>- What should be the role and responsibility of the business sector in being a change-maker?</li> <li>- What roles could the government and civil society play in order to overcome structural limitations?</li> <li>- What are the most important SUP waste management policies that should be a priority?</li> <li>- Where in the system should be improved the most with the goal to reduce SUP packaging?</li> </ul>                                                                                                                                                                                                                                                                                                                                                                                                                                                                                              |

Table S2: Coding of the interview results.

| Interview Topics                     | Stakeholders                                                                                                                                                                                                                                                                                                                                                                                                                                                                                                                                                                                                                                                                                                                                                                                                       |                                                                                                                                                                                                                                                                                                                                                                                                                                                                                                                                                                                                                                                                                                                                                                                                                                                                                                                                                                                 |                                                                                                                                                                                                                                                                                                                                                                                                                                                                                                                                                                                                                                                                                                                                                                                                                                                                                                               |                                                                                                                                                                                                                                                                                                                                                                                                                                                                                                                           |
|--------------------------------------|--------------------------------------------------------------------------------------------------------------------------------------------------------------------------------------------------------------------------------------------------------------------------------------------------------------------------------------------------------------------------------------------------------------------------------------------------------------------------------------------------------------------------------------------------------------------------------------------------------------------------------------------------------------------------------------------------------------------------------------------------------------------------------------------------------------------|---------------------------------------------------------------------------------------------------------------------------------------------------------------------------------------------------------------------------------------------------------------------------------------------------------------------------------------------------------------------------------------------------------------------------------------------------------------------------------------------------------------------------------------------------------------------------------------------------------------------------------------------------------------------------------------------------------------------------------------------------------------------------------------------------------------------------------------------------------------------------------------------------------------------------------------------------------------------------------|---------------------------------------------------------------------------------------------------------------------------------------------------------------------------------------------------------------------------------------------------------------------------------------------------------------------------------------------------------------------------------------------------------------------------------------------------------------------------------------------------------------------------------------------------------------------------------------------------------------------------------------------------------------------------------------------------------------------------------------------------------------------------------------------------------------------------------------------------------------------------------------------------------------|---------------------------------------------------------------------------------------------------------------------------------------------------------------------------------------------------------------------------------------------------------------------------------------------------------------------------------------------------------------------------------------------------------------------------------------------------------------------------------------------------------------------------|
|                                      | Policy-Level Actors                                                                                                                                                                                                                                                                                                                                                                                                                                                                                                                                                                                                                                                                                                                                                                                                | Food Delivery Platforms                                                                                                                                                                                                                                                                                                                                                                                                                                                                                                                                                                                                                                                                                                                                                                                                                                                                                                                                                         | Restaurant Partners                                                                                                                                                                                                                                                                                                                                                                                                                                                                                                                                                                                                                                                                                                                                                                                                                                                                                           | Civil Society Organizations                                                                                                                                                                                                                                                                                                                                                                                                                                                                                               |
| <b>1. Sustainability in Business</b> | <ul style="list-style-type: none"> <li>- The current business responsibility scheme is <b>voluntary</b></li> <li>- Policymakers need to know the <b>capacity and limitations of every stakeholder</b> first</li> <li>- <b>Active cooperation from the restaurants</b> is required</li> <li>- Expect to see more responsibility projects resume after COVID-19 situation</li> <li>- <b>Businesses can stop using SUPs</b> that are unnecessary or ones that have practical alternatives</li> <li>- Business sector needs to be responsible for what they produce</li> <li>- <b>Business sector is expected to actively</b> engage, communicate, and provide options to its customers. <b>Commercial incentives</b> will not only build loyalty and satisfaction but also can lead to behavioural change.</li> </ul> | <ul style="list-style-type: none"> <li>- Not only environmental responsibility. The companies extend their responsibility to <b>societal justice and welfare aspects</b> especially during the pandemic and economic downturn</li> <li>- <b>Profit-led</b> company. Every party is willing to change if the change can be translated into monetary gains.</li> <li>- <b>Multi-stakeholder.</b> Platform alone cannot absorb every cost of every initiative. The restaurant and consumers directly influence the market while platform facilitates and encourages sustainable choices</li> <li>- <b>Previous sustainable efforts failed.</b> Food handling without plastic bag during the pandemic is impossible. Cutlery charge did not work well. Platform subsidy was not sustained.</li> <li>- <b>Incentive alignment.</b> If every party satisfies with the benefits received, any initiative can be carried on under the market system without any intervention</li> </ul> | <ul style="list-style-type: none"> <li>- When packaging leads to an <b>impression.</b> Damaged products are not worth trading off with less packaging</li> <li>- Receive <b>complaints</b> at the beginning about food spilled due to poor packaging</li> <li>- Choose <b>packaging that is better (and look better)</b> for the environment</li> <li>- <b>Incentive for Bring-Your-Own.</b> Offering a discount for customers who bring their own container is a win-win strategy</li> <li>- Green packaging is very welcomed if the <b>cost stream</b> remains the same</li> <li>- Active green restaurants with their <b>own initiative.</b> Some restaurants create their own in-app packaging options for customers</li> <li>- <b>Green communication</b> is a key to preventing customer dissatisfaction</li> <li>- <b>The attitude towards SUP</b> packaging varies across restaurant types</li> </ul> | <ul style="list-style-type: none"> <li>- Packaging becomes valuable. <b>Packaging as a service.</b></li> <li>- <b>Flexibility</b> is a key for niches to move closer to a sustainable transition model</li> <li>- <b>Product and service as a communication channel</b></li> <li>- Niches <b>communication strategies: inside-out and outside-in.</b> Niches' role in the system has been increasingly highlighted</li> <li>- Deliver impressive <b>user experiences</b> to provoke pro-environmental behavior</li> </ul> |

| Interview Topics                                | Stakeholders                                                                                                                                                                                                                                                                                                                                                                                                   |                                                                                                                                                                                                                                                                                                                                                                                                                                                                                                                                                                           |                                                                                                                                                                                                                                                                                                                |                                                                                                                                                                                                                                                                                                                                |
|-------------------------------------------------|----------------------------------------------------------------------------------------------------------------------------------------------------------------------------------------------------------------------------------------------------------------------------------------------------------------------------------------------------------------------------------------------------------------|---------------------------------------------------------------------------------------------------------------------------------------------------------------------------------------------------------------------------------------------------------------------------------------------------------------------------------------------------------------------------------------------------------------------------------------------------------------------------------------------------------------------------------------------------------------------------|----------------------------------------------------------------------------------------------------------------------------------------------------------------------------------------------------------------------------------------------------------------------------------------------------------------|--------------------------------------------------------------------------------------------------------------------------------------------------------------------------------------------------------------------------------------------------------------------------------------------------------------------------------|
|                                                 | Policy-Level Actors                                                                                                                                                                                                                                                                                                                                                                                            | Food Delivery Platforms                                                                                                                                                                                                                                                                                                                                                                                                                                                                                                                                                   | Restaurant Partners                                                                                                                                                                                                                                                                                            | Civil Society Organizations                                                                                                                                                                                                                                                                                                    |
| 2.1 Initiatives review 1: No Cutlery default    | <ul style="list-style-type: none"> <li>- Opt-in, opt-out <b>should be clear</b>.</li> <li>- Anything related to customer usage experience <b>should be optional</b></li> <li>- Platforms and the government should <b>communicate to the restaurant</b> about the opt-in system in order to limit unwanted SUP cutlery.</li> <li>- <b>Restaurants' service mindset</b> needs to be re-communicated.</li> </ul> | <ul style="list-style-type: none"> <li>- Technically <b>easy</b>, requires less resources and effort</li> <li>- <b>practical limitations</b> as the restaurant often ignores the request.</li> <li>- Platform regularly <b>communicates</b> this issue to the restaurants.</li> <li>- <b>Customer feedback</b> can help the platforms and restaurants to adjust their policy</li> <li>- <b>Platforms evaluate</b> its partner restaurants on food quality, hygiene, order accuracy, preparation time and staff training, but not on how much plastics are used</li> </ul> | <ul style="list-style-type: none"> <li>- This initiative can <b>reduce cost</b> but also poses risk for customer <b>complaints</b>.</li> <li>- See more notes about customers not wanting cutlery and condiments.</li> </ul>                                                                                   | <ul style="list-style-type: none"> <li>- In order to see a significant impact, <b>charges</b> for cutlery should be considered</li> <li>- Require less effort, <b>save cost</b>, and a <b>high chance of success</b></li> </ul>                                                                                                |
| 2.2 Initiatives review 2: Packaging Procurement | <ul style="list-style-type: none"> <li>- <b>Should have options</b> for consumers, especially when they need to pay more</li> <li>- As long as the <b>price</b> of environmentally friendly products is higher, <b>the chance of success is low</b>.</li> <li>- Some packaging <b>does not have alternatives</b>.</li> </ul>                                                                                   | <ul style="list-style-type: none"> <li>- Platform procurement and subsidy alone cannot sustain the program and <b>long-term incentive is not yet available</b>.</li> <li>- <b>Government subsidy</b> at the macro level is needed</li> <li>- <b>Willingness to pay</b> for alternative packaging at individual level, both the consumer and the restaurants, are vary</li> </ul>                                                                                                                                                                                          | <ul style="list-style-type: none"> <li>- The restaurants are <b>not aware of platforms' green packaging discount campaigns</b>. Maybe the platforms need more marketing and promotions.</li> <li>- Still a <b>price barrier</b>.</li> <li>- Never receive complaints about not using eco-packaging.</li> </ul> | <ul style="list-style-type: none"> <li>- Platform subsidies are designed to be <b>voluntary</b>. Eco packaging should be <b>optional</b> for consumers if they need to pay more.</li> <li>- Should be coupled with the labelling program</li> <li>- <b>Only value-added restaurants</b> would opt for eco-packaging</li> </ul> |
| 2.3 Initiatives review 3: Labelling             | <ul style="list-style-type: none"> <li>- Can be done <b>easily</b></li> <li>- <b>Platform supports</b> green restaurants</li> </ul>                                                                                                                                                                                                                                                                            | <ul style="list-style-type: none"> <li>- May have a <b>low impact</b>.</li> <li>- Adding labels will only cause an <b>overloaded information</b>.</li> </ul>                                                                                                                                                                                                                                                                                                                                                                                                              | <ul style="list-style-type: none"> <li>- If the incentives are <b>profitable enough</b>, the restaurants would join the campaign more.</li> </ul>                                                                                                                                                              | <ul style="list-style-type: none"> <li>- Easy to do but <b>will not change minds or behavior</b></li> <li>- Platforms should consider</li> </ul>                                                                                                                                                                               |

| Interview Topics                                       | Stakeholders                                                                                                                                                                                                                                                                                                                                                                        |                                                                                                                                                                                                                                                                                                                                                                                                                                                                                                                                                                          |                                                                                                                                                                                                                                                               |                                                                                                                                                                                                                                                                                                                                                                                                                                                                                                                                                                               |
|--------------------------------------------------------|-------------------------------------------------------------------------------------------------------------------------------------------------------------------------------------------------------------------------------------------------------------------------------------------------------------------------------------------------------------------------------------|--------------------------------------------------------------------------------------------------------------------------------------------------------------------------------------------------------------------------------------------------------------------------------------------------------------------------------------------------------------------------------------------------------------------------------------------------------------------------------------------------------------------------------------------------------------------------|---------------------------------------------------------------------------------------------------------------------------------------------------------------------------------------------------------------------------------------------------------------|-------------------------------------------------------------------------------------------------------------------------------------------------------------------------------------------------------------------------------------------------------------------------------------------------------------------------------------------------------------------------------------------------------------------------------------------------------------------------------------------------------------------------------------------------------------------------------|
|                                                        | Policy-Level Actors                                                                                                                                                                                                                                                                                                                                                                 | Food Delivery Platforms                                                                                                                                                                                                                                                                                                                                                                                                                                                                                                                                                  | Restaurant Partners                                                                                                                                                                                                                                           | Civil Society Organizations                                                                                                                                                                                                                                                                                                                                                                                                                                                                                                                                                   |
| <b>Program</b>                                         | <ul style="list-style-type: none"> <li>- The key is how to <b>make the restaurants opt for greener packaging</b> because labelling alone is not enough to influence the restaurant decision</li> <li>- It is scalable but <b>takes time</b></li> </ul>                                                                                                                              | <ul style="list-style-type: none"> <li>- Adding eco-label will lessen the visibility of <b>other labels</b></li> </ul>                                                                                                                                                                                                                                                                                                                                                                                                                                                   | <ul style="list-style-type: none"> <li>- Interesting because <b>consumers seem to care more</b> about SUP packaging.</li> </ul>                                                                                                                               | <ul style="list-style-type: none"> <li>- giving out <b>discounts</b> for customers who engage in this program</li> </ul>                                                                                                                                                                                                                                                                                                                                                                                                                                                      |
| <b>2.4 Initiatives review 4: Deposit-return Scheme</b> | <ul style="list-style-type: none"> <li>- Reuse system during COVID-19 is <b>challenging</b></li> <li>- <b>High cost</b> and may be applicable to <b>limited areas</b></li> <li>- Take-back system and EPR <b>should be mandatory</b></li> <li>- <b>Only some</b> SUPs packaging <b>can be returned</b></li> <li>- <b>Hygienic issues</b> need to be cautiously addressed</li> </ul> | <ul style="list-style-type: none"> <li>- Nearly <b>impossible</b></li> <li>- Consumption behavior of the Thais is still based on <b>convenience factors</b></li> <li>- The size of participants may <b>not be lucrative enough</b> for a company to invest</li> <li>- Very operational heavy. adding another round for pick-up is <b>not economically viable</b></li> <li>- Setting up drop point facilities is not enough</li> <li>- The market needs an <b>efficient central waste management system</b> and infrastructure that supports this reuse scheme</li> </ul> | <ul style="list-style-type: none"> <li>- Only causes delay and <b>complications</b>. Both restaurant and customer want fast and <b>convenient service</b>.</li> <li>- The outer bags can be returned. Most of the time they are in good condition.</li> </ul> | <ul style="list-style-type: none"> <li>- Platforms cannot find this model <b>profitable</b></li> <li>- Platform can gain <b>loyalty</b> and customer retention through this model</li> <li>- Platform as a system driver. Having platforms as the intermediaries, it can <b>overcome the limitation</b> of the scattered restaurants</li> <li>- <b>Norms</b> need to be established. Normalizing the system takes time as it requires <b>societal change</b></li> <li>- The ideal concept is no extra km to do</li> <li>- Need to validated <b>hygiene</b> concept</li> </ul> |

| Interview Topics            | Stakeholders                                                                                                                                                                                                                                                                                                                                                                                                                                                                                                                                                                                                                                                                                                                                                    |                                                                                                                                                                                                                                                                                                                                                                                                                                                                                                                                                                                                                                                                                                     |                                                                                                                                                                                                                                                                                                                                                                                                   |                                                                                                                                                                                                                                                                                                                                                                                                                                         |
|-----------------------------|-----------------------------------------------------------------------------------------------------------------------------------------------------------------------------------------------------------------------------------------------------------------------------------------------------------------------------------------------------------------------------------------------------------------------------------------------------------------------------------------------------------------------------------------------------------------------------------------------------------------------------------------------------------------------------------------------------------------------------------------------------------------|-----------------------------------------------------------------------------------------------------------------------------------------------------------------------------------------------------------------------------------------------------------------------------------------------------------------------------------------------------------------------------------------------------------------------------------------------------------------------------------------------------------------------------------------------------------------------------------------------------------------------------------------------------------------------------------------------------|---------------------------------------------------------------------------------------------------------------------------------------------------------------------------------------------------------------------------------------------------------------------------------------------------------------------------------------------------------------------------------------------------|-----------------------------------------------------------------------------------------------------------------------------------------------------------------------------------------------------------------------------------------------------------------------------------------------------------------------------------------------------------------------------------------------------------------------------------------|
|                             | Policy-Level Actors                                                                                                                                                                                                                                                                                                                                                                                                                                                                                                                                                                                                                                                                                                                                             | Food Delivery Platforms                                                                                                                                                                                                                                                                                                                                                                                                                                                                                                                                                                                                                                                                             | Restaurant Partners                                                                                                                                                                                                                                                                                                                                                                               | Civil Society Organizations                                                                                                                                                                                                                                                                                                                                                                                                             |
| 3. Environmental Governance | <ul style="list-style-type: none"> <li>- Government agencies need to <b>work together</b> in integration</li> <li>- Improve the current <b>tax incentive scheme</b></li> <li>- Seriously enforce a <b>tax disincentive scheme</b>. Environmental costs of SUP should be <b>internalized</b></li> <li>- Government should regulate <b>standards on eco-labelling</b></li> <li>- Government can develop policies and measures that tackle <b>every stage in the system</b></li> <li>- Setting up <b>mutual understanding</b> and communicating to all stakeholders</li> <li>- <b>Economic measures, law and regulations</b> to support the stakeholders' sustainable initiatives across the downstream, middle stream and upstream of the supply chain</li> </ul> | <ul style="list-style-type: none"> <li>- <b>Mutual direction</b> as a guideline for platforms and restaurants to follow</li> <li>- <b>Post-consumption waste management system</b> will make business models and individual consumption behavior adjusted accordingly</li> <li>- Clear <b>packaging regulation</b></li> <li>- MOU is a good start, but we need more than that</li> <li>- <b>Government subsidies</b> could help tackle the structural problem especially during the economic downturns. The subsidy of alternative packaging at the initial stage can create <b>demand</b></li> <li>- Only intervention from the <b>government</b> can sustain the greener market system</li> </ul> | <ul style="list-style-type: none"> <li>- Government needs to have <b>clear and solid practices</b> for us (the restaurants) to conform.</li> <li>- Government should promote <b>alternative packaging</b> through a <b>pricing</b> mechanism. <b>Costs</b> of alternative packaging should be lower.</li> <li>- Government should develop an effective <b>waste management system</b>.</li> </ul> | <ul style="list-style-type: none"> <li>- Promote <b>mono-material packaging</b> for ease of post-consumption management</li> <li>- Government should set a <b>framework</b> for every stakeholder to follow</li> <li>- Promote environmental <b>awareness and understanding among the government</b> sectors</li> <li>- <b>Government should support</b> all sustainable actions with knowhow, communication, and regulation</li> </ul> |
| 4. System Analysis          | <ul style="list-style-type: none"> <li>- <b>Digital economy and urbanization</b> are among the key drivers of unsustainable consumption. It produces a lazy-economy and convenience-based lifestyle</li> <li>- <b>Hard and soft policies</b> need to</li> </ul>                                                                                                                                                                                                                                                                                                                                                                                                                                                                                                 | <ul style="list-style-type: none"> <li>- <b>Contribution from every stakeholder</b> is needed. While packaging suppliers, platforms, and restaurants absorb additional cost of alternative packaging or reduce unnecessary packaging, Consumers also must put more effort into</li> </ul>                                                                                                                                                                                                                                                                                                                                                                                                           | <ul style="list-style-type: none"> <li>- <b>Cost minimization</b> principle of small-size restaurants</li> <li>- Restaurant <b>branding and positioning</b> matters</li> <li>- Platforms' social responsibility can be <b>spilled over</b> to their restaurant partners.</li> </ul>                                                                                                               | <ul style="list-style-type: none"> <li>- In order to adopt greener packaging, the system needs to shift from industrial suppliers where there are only few producers to <b>local suppliers</b> that use local materials</li> </ul>                                                                                                                                                                                                      |

| Interview<br>Topics | Stakeholders                                                                                                                                                                                                                                                                                                                                                                                                                                                                                                                                                                                                         |                                                                                                                                                                                                                                                                                                                                                                                                                                                                                                                                                                                                                                                                       |                                                                                                                                                                 |                                                                                                                                                                                                                                                                                                                                                                                                                                                                                                                                                                                                                                                                                                                                                                                                                                                                                     |
|---------------------|----------------------------------------------------------------------------------------------------------------------------------------------------------------------------------------------------------------------------------------------------------------------------------------------------------------------------------------------------------------------------------------------------------------------------------------------------------------------------------------------------------------------------------------------------------------------------------------------------------------------|-----------------------------------------------------------------------------------------------------------------------------------------------------------------------------------------------------------------------------------------------------------------------------------------------------------------------------------------------------------------------------------------------------------------------------------------------------------------------------------------------------------------------------------------------------------------------------------------------------------------------------------------------------------------------|-----------------------------------------------------------------------------------------------------------------------------------------------------------------|-------------------------------------------------------------------------------------------------------------------------------------------------------------------------------------------------------------------------------------------------------------------------------------------------------------------------------------------------------------------------------------------------------------------------------------------------------------------------------------------------------------------------------------------------------------------------------------------------------------------------------------------------------------------------------------------------------------------------------------------------------------------------------------------------------------------------------------------------------------------------------------|
|                     | Policy-Level Actors                                                                                                                                                                                                                                                                                                                                                                                                                                                                                                                                                                                                  | Food Delivery Platforms                                                                                                                                                                                                                                                                                                                                                                                                                                                                                                                                                                                                                                               | Restaurant Partners                                                                                                                                             | Civil Society Organizations                                                                                                                                                                                                                                                                                                                                                                                                                                                                                                                                                                                                                                                                                                                                                                                                                                                         |
|                     | <p>complement one another</p> <ul style="list-style-type: none"> <li>- <b>Tax and non-tax incentives</b> are what the government can offer at this time</li> <li>- <b>Awareness and behavioral change</b> need to be coupled with supportive <b>infrastructure</b></li> <li>- Consider <b>new players</b> in the market.</li> <li>- Raise <b>awareness</b> in the long term, provide <b>incentives</b> along the way, and introduce <b>regulations</b></li> <li>- Platforms' <b>monetary measures</b> can be <b>compulsorily</b> applied</li> <li>- <b>Incentives</b> as marketing and behavioral nudging</li> </ul> | <p>rejecting unwanted plastics and post-consumption responsibility</p> <ul style="list-style-type: none"> <li>- The restaurants can be the real changemakers. They are the <b>decision maker</b> regarding packaging choice.</li> <li>- <b>Demand-led</b> sustainable packaging transition. Alternative packaging should be promoted and supported to create initial demand which will then accelerate supply and lower the price according to the rule of economics.</li> <li>- <b>Cost and profit</b> are the key. Any intervention anywhere in the system that can lift the economy of the business, whether it is to drive the sales or lower the cost</li> </ul> | <ul style="list-style-type: none"> <li>- Currently, the restaurants feel that they have <b>not received enough solid support</b> from the platforms.</li> </ul> | <ul style="list-style-type: none"> <li>- Disrupt the system even if the structure is unchanged. While the government slowly implements its policies and measures, sustainable niches can <b>disrupt the system with technologies</b>.</li> <li>- <b>Bottom-up approach</b> works. Starts from individual voice</li> <li>- Customers are willing and ready to support responsible business when <b>incentives</b> are offered</li> <li>- Platform companies are also willing and ready to change if considerable <b>incentives</b> are offered</li> <li>- Eco-packaging <b>suppliers can act as promoters</b> in the system</li> <li>- The ideal role of niches is to <b>disrupt the system</b> by making the restaurants benefit with low investment and system cost</li> <li>- Key is to <b>make alternative packaging cheaper</b>. Involve tax and non-tax incentives.</li> </ul> |

| Interview Topics                                 | Stakeholders                                                                                                                                                                                                                                                 |                                                                                                                                                                                                                                                                                                                                                                                                                                                                                                                                                                    |                                                                                                                                                                                                                                                                                                                         |                                                                                                                                                                                                                                                                                                                                                                                                                                                                                                                                                                                                                                                                                                                                                        |
|--------------------------------------------------|--------------------------------------------------------------------------------------------------------------------------------------------------------------------------------------------------------------------------------------------------------------|--------------------------------------------------------------------------------------------------------------------------------------------------------------------------------------------------------------------------------------------------------------------------------------------------------------------------------------------------------------------------------------------------------------------------------------------------------------------------------------------------------------------------------------------------------------------|-------------------------------------------------------------------------------------------------------------------------------------------------------------------------------------------------------------------------------------------------------------------------------------------------------------------------|--------------------------------------------------------------------------------------------------------------------------------------------------------------------------------------------------------------------------------------------------------------------------------------------------------------------------------------------------------------------------------------------------------------------------------------------------------------------------------------------------------------------------------------------------------------------------------------------------------------------------------------------------------------------------------------------------------------------------------------------------------|
|                                                  | Policy-Level Actors                                                                                                                                                                                                                                          | Food Delivery Platforms                                                                                                                                                                                                                                                                                                                                                                                                                                                                                                                                            | Restaurant Partners                                                                                                                                                                                                                                                                                                     | Civil Society Organizations                                                                                                                                                                                                                                                                                                                                                                                                                                                                                                                                                                                                                                                                                                                            |
| <b>5. Limitations to Sustainable Consumption</b> | <ul style="list-style-type: none"> <li>- The existing system does not lean towards circularity but rather <b>linear</b></li> <li>- <b>Reduce alone is not possible</b> in this capitalized economy. What remains necessary should be well-managed</li> </ul> | <ul style="list-style-type: none"> <li>- <b>Willingness to Pay gap</b> of both the restaurants and the customers</li> <li>- <b>Awareness gap</b> across individuals. System, infrastructure, measures, and regulations need to be improved in parallel</li> <li>- There is <b>no practical alternative</b>. The 'reduce' and 'replace' may not be the best solution. We should also focus on '<b>recycling</b>'</li> <li>- Lack of <b>regulation</b> on green production and consumption</li> <li>- <b>Voluntary measures</b> will not take us anywhere</li> </ul> | <ul style="list-style-type: none"> <li>- Some green packaging is <b>not practical</b></li> <li>- Communication and <b>differences in concern</b> level</li> <li>- High <b>price sensitivity</b>. Charging more is the last thing to do</li> <li>- BYO policies cannot be applied to most of these scenarios.</li> </ul> | <ul style="list-style-type: none"> <li>- We cannot make every stakeholder <b>understand and engage</b> in Thailand's waste management system</li> <li>- Inefficient <b>waste management systems</b> limit behavioral change</li> <li>- <b>Demand-driven</b> to gain <b>economies of scale</b> for eco-packaging.</li> <li>- <b>The pandemic</b> delayed the promotion of zero waste behavior</li> <li>- When sustainable consumption is not aligned with <b>human's convenience-based intuition</b>. New mindset needs to be implanted</li> <li>- <b>Mandatory responsibility for individual waste management</b>. If every individual is required to be responsible for his/her own waste, the consumption decision will be more conscious</li> </ul> |
